# Supplementary material for: Cellulose Nanofiber-Based Aerogels from Wheat Straw: Influence of Surface Load and Lignin Content on Their Properties and Dye Removal Capacity
Source: MDPI journal article supplement (doi:10.3390/biom12020232), 2022-01-29
Supplement: s1 [file s1]

# SUPPLEMENTARY

Table S1. Results in Density, Porosity, Tensile Strength and Young Modulus for the different aerogels.

| Treatment | Consistency | Density (mg/cm <sup>3</sup> ) | Porosity   | Tensile Strength (kPa) | Young Modulus (kPa) |
|-----------|-------------|-------------------------------|------------|------------------------|---------------------|
| LCNF-Mec  | 0,2         | 7.46±1.94                     | 99.61±0.03 | 23.44±3.56             | 230±20              |
|           | 0,4         | 10.10±0.34                    | 99.32±0.03 | 30.92±0.93             | 458±32              |
|           | 0,6         | 14.27±0.28                    | 99.06±0.07 | 46.70±4.41             | 418±1               |
|           | 0,8         | 16.45±1.68                    | 98,94±0.17 | 67.87±5.92             | 526±47              |
| CNF-Mec   | 0,2         | 4.87±0.77                     | 99.66±0.05 | 17.24±0.94             | 466±48              |
|           | 0,4         | 7.60±1.02                     | 99.83±0.24 | 18.80±0.45             | 413±160             |
|           | 0,6         | 9.63±0.71                     | 99.57±0.02 | 35.00±3.19             | 354±6               |
|           | 0,8         | 13.43±1.19                    | 99.24±0.08 | 61.58±1.93             | 646±138             |
| LCNF-TO3  | 0,2         | 5.13±0.54                     | 99.70±0.09 | 18.87±2.67             | 227±40              |
|           | 0,4         | 6.23±0.32                     | 99.79±0.28 | 19.36±0.24             | 259±43              |
|           | 0,6         | 9.28±2.63                     | 99.33±0.05 | 49.08±14.26            | 363±65              |
|           | 0,8         | 10.76±1.39                    | 99.20±0.00 | 42.27±13.60            | 389±91              |
| CNF-TO3   | 0,2         | 3.96±0.15                     | 99.76±0.05 | 16.64±3.37             | 298±190             |
|           | 0,4         | 6.61±0.28                     | 99.59±0.04 | 39.76±0.49             | 242±93              |
|           | 0,6         | 9.67±0.62                     | 99.34±0.03 | 34.86±1.89             | 266±38              |
|           | 0,8         | 12.79±0.53                    | 99.22±0.02 | 61.15±5.44             | 473±94              |
| LCNF-TO5  | 0,2         | 4.96±0.63                     | 99.75±0.17 | 20.06±2.31             | 277±28              |
|           | 0,4         | 6.05±0.06                     | 99.49±0.07 | 17.79±2.08             | 259±62              |
|           | 0,6         | 9.77±0.86                     | 99.36±0.05 | 33.75±12.59            | 270±77              |
|           | 0,8         | 12.38±0.90                    | 99.10±0.08 | 54.67±4.08             | 577±61              |
| CNF-TO5   | 0,2         | 4.28±0.56                     | 99.74±0.01 | 13.87±0.90             | 160±1               |
|           | 0,4         | 5.71±0.93                     | 99.55±0.02 | 18.23±0.60             | 167±20              |
|           | 0,6         | 8.66±1.15                     | 99.35±0.04 | 36.92±7.42             | 421±111             |
|           | 0,8         | 13.85±3.35                    | 99.15±0.04 | 61.00±2.63             | 484±101             |
| LCNF-TO10 | 0,2         | 3.55±0.79                     | 99.71±0.03 | 20.65±1.02             | 214±60              |
|           | 0,4         | 6.03±0.58                     | 99.62±0.06 | 26.32±2.80             | 274±29              |
|           | 0,6         | 9.82±0.50                     | 99.42±0.08 | 38.76±9.22             | 325±13              |
|           | 0,8         | 11.59±0.24                    | 99.08±0.22 | 51.80±1.41             | 536±13              |
| CNF-TO10  | 0,2         | 3.82±0.55                     | 99.75±0.04 | 16.43±0.32             | 136±78              |
|           | 0,4         | 5.47±0.33                     | 99.63±0.02 | 17.15±0.73             | 204±55              |
|           | 0,6         | 8.63±0.68                     | 99.42±0.05 | 29.25±2.75             | 286±70              |
|           | 0,8         | 12.29±1.02                    | 99.18±0.00 | 56.84±1.86             | 525±122             |

Table S2. Density, Specific Tensile Strength (TS) and Young's Modulus (YM) of the aerogels.

| Treatment | Consistency | Density<br>(mg/cm <sup>3</sup> ) | Specific TS<br>(kPa·cm <sup>3</sup> /mg) | Specific YM<br>(kPa·cm <sup>3</sup> /mg) |
|-----------|-------------|----------------------------------|------------------------------------------|------------------------------------------|
| LCNF-Mec  | 0,2         | 7.46±1.94                        | 3.41±0.23                                | 33.45±2.87                               |
|           | 0,4         | 10.10±0.34                       | 3.06±0.10                                | 45.35±1.23                               |
|           | 0,6         | 14.27±0.28                       | 3.27±0.31                                | 29.29±0.04                               |
|           | 0,8         | 16.45±1.68                       | 4.13±0.36                                | 31.95±2.87                               |
| CNF-Mec   | 0,2         | 5.31±0.14                        | 3.54±0.15                                | 95.78±9.89                               |
|           | 0,4         | 7.60±1.02                        | 2.47±0.06                                | 54.36±21.01                              |
|           | 0,6         | 9.63±0.71                        | 3.63±0.33                                | 36.67±0.65                               |
|           | 0,8         | 13.43±1.19                       | 4.58±0.14                                | 48.07±10.29                              |
| LCNF-TO3  | 0,2         | 5.13±0.54                        | 3.68±0.52                                | 44.24±7.74                               |
|           | 0,4         | 6.23±0.32                        | 3.10±0.04                                | 41.50±6.94                               |
|           | 0,6         | 9.28±2.63                        | 5.29±1.54                                | 39.15±2.36                               |
|           | 0,8         | 10.76±1.39                       | 3.93±1.26                                | 36.10±8.48                               |
| CNF-TO3   | 0,2         | 3.96±0.15                        | 4.20±0.85                                | 75.31±47.89                              |
|           | 0,4         | 6.61±0.28                        | 6.02±0.56                                | 36.66±14.19                              |
|           | 0,6         | 9.67±0.62                        | 3.60±0.20                                | 27.52±3.98                               |
|           | 0,8         | 12.79±0.53                       | 4.78±0.43                                | 37.01±7.38                               |
| LCNF-TO5  | 0,2         | 4.96±0.63                        | 4.05±0.05                                | 55.80±4.56                               |
|           | 0,4         | 6.05±0.06                        | 2.94±0.34                                | 42.75±10.24                              |
|           | 0,6         | 9.77±0.86                        | 3.45±1.29                                | 27.65±7.92                               |
|           | 0,8         | 12.38±0.90                       | 4.42±0.33                                | 46.56±4.91                               |
| CNF-TO5   | 0,2         | 4.28±0.56                        | 3.24±0.21                                | 37.36±0.17                               |
|           | 0,4         | 5.71±0.93                        | 3.19±0.11                                | 29.18±3.52                               |
|           | 0,6         | 8.66±1.15                        | 4.26±0.86                                | 48.66±12.84                              |
|           | 0,8         | 13.85±3.35                       | 4.40±0.19                                | 34.94±7.26                               |
| LCNF-TO10 | 0,2         | 3.55±0.79                        | 5.82±0.29                                | 60.23±16.97                              |
|           | 0,4         | 6.03±0.58                        | 4.70±0.05                                | 45.48±4.81                               |
|           | 0,6         | 9.82±0.50                        | 3.95±0.94                                | 33.12±2.58                               |
|           | 0,8         | 11.59±0.24                       | 4.47±0.12                                | 46.30±1.08                               |
| CNF-TO10  | 0,2         | 3.82±0.55                        | 4.47±0.23                                | 49.60±19.72                              |
|           | 0,4         | 5.47±0.33                        | 4.01±1.38                                | 36.69±9.32                               |
|           | 0,6         | 8.63±0.68                        | 5.02±1.99                                | 44.86±8.46                               |
|           | 0,8         | 12.29±1.02                       | 4.73±0.02                                | 49.78±3.75                               |
